# Supplementary material for: Short-Term Effectiveness of a Mobile Phone App for Increasing Physical Activity and Adherence to the Mediterranean Diet in Primary Care: A Randomized Controlled Trial (EVIDENT II Study)
Source: PubMed Central journal article supplement (PMC5206481; doi:10.2196/jmir.6814), 2016-12-19
Supplement: jmir_v18i12e331_app1.pdf [file jmir_v18i12e331_app1.pdf]

## Baseline adherence to the Mediterranean diet

| Criteria mediterranean diet                                                                                           | APPG<br>(415; 49.8%) |      | CG<br>(418;50,2%) |      | P   |
|-----------------------------------------------------------------------------------------------------------------------|----------------------|------|-------------------|------|-----|
|                                                                                                                       | N                    | (%)  | N                 | (%)  |     |
| 1. Using olive oil as the principal source of fat for cooking                                                         | 389                  | (94) | 394               | (94) | .77 |
| 2. $\geq 4$ T (1 T=13.5 g) of olive oil/d (eg, used in frying, salads, meals eaten away from home)                    | 154                  | (37) | 135               | (32) | .15 |
| 3. 2 or more servings of vegetables/d                                                                                 | 166                  | (40) | 151               | (36) | .25 |
| 4. 3 or more pieces of fruit/d                                                                                        | 180                  | (43) | 177               | (42) | .78 |
| 5. 1 serving of red meat or sausages/d                                                                                | 347                  | (84) | 355               | (85) | .63 |
| 6. 1 serving of animal fat/d                                                                                          | 378                  | (91) | 379               | (91) | .90 |
| 7. 1 cup (1 cup=100 mL) of sugar-sweetened beverages/d                                                                | 356                  | (86) | 363               | (87) | .69 |
| 8. $\geq 7$ servings of red wine/week                                                                                 | 79                   | (19) | 70                | (17) | .42 |
| 9. $\geq 3$ servings of legumes/week                                                                                  | 98                   | (24) | 81                | (19) | .15 |
| 10. $\geq 3$ servings of fish/week                                                                                    | 163                  | (39) | 183               | (44) | .21 |
| 11. $< 2$ commercial pastries/week                                                                                    | 206                  | (50) | 195               | (47) | .41 |
| 12. $\geq 3$ servings of nuts/week                                                                                    | 149                  | (36) | 123               | (29) | .05 |
| 13. Preferring white meat over red meat?                                                                              | 282                  | (68) | 261               | (62) | .11 |
| 14. $\geq 2$ servings/wk of a dish with a traditional sauce of tomatoes, garlic, onion, or leeks sautéed in olive oil | 220                  | (53) | 223               | (53) | .94 |
| Study participants with a total score $\geq 9$ points (n,%)                                                           | 142                  | (34) | 119               | (28) | .09 |
| Score for adherence to Mediterranean Diet (mean $\pm$ SD)                                                             | 7.6                  | 2.1  | 7.4               | 2.0  | .09 |

APPG: Counseling+APP group, CG: Counseling group. APP: Smartphone application. Categorical variables are expressed as number (n) and (%) and continuous variables as mean  $\pm$  standard deviation (SD). P: statistically significant differences ( $P < .05$ ). ANCOVA test adjusted by baseline measure and Fisher test.
