# Supplementary material for: Short-Term Effectiveness of a Mobile Phone App for Increasing Physical Activity and Adherence to the Mediterranean Diet in Primary Care: A Randomized Controlled Trial (EVIDENT II Study)
Source: PubMed Central journal article supplement (PMC5206481; doi:10.2196/jmir.6814), 2016-12-19
Supplement: jmir_v18i12e331_app2.pdf [file jmir_v18i12e331_app2.pdf]

### Subgroup analyses by age, gender, baseline physical activity and weight

| Gender                   |                                           | Mean<br>Difference<br>(APPG-CG) | CI 95%            | P           |
|--------------------------|-------------------------------------------|---------------------------------|-------------------|-------------|
| Women                    | METS minute/week in leisure time          | 130.3                           | (-38.0 to 298.6)  | .129        |
|                          | Total MVPA minute /week                   | 1.9                             | (-29.4 to 33.2)   | .905        |
|                          | Score for adherence to Mediterranean Diet | -0.1                            | (-0.4 to 0.2)     | .464        |
| Men                      | METS minute/week in leisure time          | -80.0                           | (-330.3 to 170.4) | .530        |
|                          | Total MVPA minute /week                   | -50.9                           | (-99.7 to -2.0)   | <b>.042</b> |
|                          | Score for adherence to Mediterranean Diet | 0.1                             | (-0.3 to 0.5)     | .529        |
| <b>Age groups</b>        |                                           |                                 |                   |             |
| < 40 years               | METS minute/week in leisure time          | 1.3                             | (-271.8 to 274.4) | .993        |
|                          | Total MVPA minute /week                   | -20.6                           | (-73.9 to 32.8)   | 0.45        |
|                          | Score for adherence to Mediterranean Diet | -0.2                            | (-0.6 to 0.3)     | 0.49        |
| 40-60 years              | METS minute/week in leisure time          | 125.8                           | (-61.9 to 313.5)  | 0.19        |
|                          | Total MVPA minute /week                   | -5.8                            | (-45.8 to 34.2)   | 0.78        |
|                          | Score for adherence to Mediterranean Diet | 0.1                             | (-0.2 to 0.5)     | 0.46        |
| > 60 years               | METS minute/week in leisure time          | 33.1                            | (-265.1 to 331.3) | 0.83        |
|                          | Total MVPA minute /week                   | -33.7                           | (-83.0 to 15.6)   | 0.18        |
|                          | Score for adherence to Mediterranean Diet | -0.1                            | (-0.6 to 0.3)     | 0.53        |
| <b>Physical activity</b> |                                           |                                 |                   |             |
| Sedentary                | METS minute/week in leisure time          | 48.1                            | (-84.2 to 180.4)  | 0.48        |
|                          | Total MVPA minute /week                   | -9.8                            | (-39.9 to 20.4)   | 0.53        |
|                          | Score for adherence to Mediterranean Diet | 0.0                             | (-0.3 to 0.3)     | 0.88        |
| Active                   | METS minute/week in leisure time          | 61.2                            | (-301.1 to 423.5) | 0.74        |
|                          | Total MVPA minute /week                   | -31.8                           | (-89.0 to 25.5)   | 0.28        |
|                          | Score for adherence to Mediterranean Diet | -0.1                            | (-0.6 to 0.3)     | 0.62        |
| <b>BMI</b>               |                                           |                                 |                   |             |
| BMI<25                   | METS minute/week in leisure time          | 53.5                            | (-206.6 to 313.6) | 0.69        |
|                          | Total MVPA minute /week                   | -41.8                           | (-90.2 to 6.6)    | 0.09        |
|                          | Score for adherence to Mediterranean Diet | 0.1                             | (-0.4 to 0.5)     | 0.81        |
| BMI 25-30                | METS minute/week in leisure time          | 92.2                            | (-128.8 to 313.1) | 0.41        |
|                          | Total MVPA minute /week                   | 2.9                             | (-41.0 to 46.8)   | 0.90        |
|                          | Score for adherence to Mediterranean Diet | 0.0                             | (-0.4 to 0.3)     | 0.84        |
| BMI > 30                 | METS minute/week in leisure time          | -14.5                           | (-262.5 to 233.5) | 0.91        |
|                          | Total MVPA minute /week                   | -19.7                           | (-67.8 to 28.3)   | 0.42        |
|                          | Score for adherence to Mediterranean Diet | -0.1                            | (-0.5 to 0.4)     | 0.81        |

APPG: Counseling+APP group, CG: Counseling group. BMI: Body mass index. MVPA: Moderate Vigorous/very vigorous physical activity. METS: metabolic equivalents. P: statistically significant differences ( $P < .05$ ). ANCOVA test adjusted by baseline measure comparing changes between intervention and control groups.
