# Supplementary material for: Short-Term Effectiveness of a Mobile Phone App for Increasing Physical Activity and Adherence to the Mediterranean Diet in Primary Care: A Randomized Controlled Trial (EVIDENT II Study)
Source: PubMed Central journal article supplement (PMC5206481; doi:10.2196/jmir.6814), 2016-12-19
Supplement: jmir_v18i12e331_app3.pdf [file jmir_v18i12e331_app3.pdf]

### Subgroup analyses by sociodemographic variables

| Civil status                       |                                           | Mean Difference<br>(APPG-CG) | CI 95%             | P    |
|------------------------------------|-------------------------------------------|------------------------------|--------------------|------|
| Single                             | METS minute/week in leisure time          | 42.1                         | (-331.8 to 416.0)  | 0.82 |
|                                    | Total MVPA minute /week                   | -48.0                        | (-121.0 to 25.0)   | 0.20 |
|                                    | Score for adherence to Mediterranean Diet | 0.1                          | (-0.5 to 0.7)      | 0.74 |
| Married                            | METS minute/week in leisure time          | 37.7                         | (-127.5 to 202.9)  | 0.65 |
|                                    | Total MVPA minute /week                   | -7.5                         | (-38.9 to 24.0)    | 0.64 |
|                                    | Score for adherence to Mediterranean Diet | 0.0                          | (-0.3 to 0.3)      | 0.94 |
| Separate                           | METS minute/week in leisure time          | 100.1                        | (-388.8 to 589.0)  | 0.68 |
|                                    | Total MVPA minute /week                   | 12.3                         | (-80.2 to 104.8)   | 0.79 |
|                                    | Score for adherence to Mediterranean Diet | -0.7                         | (-1.7 to 0.2)      | 0.14 |
| Widower                            | METS minute/week in leisure time          | 300.3                        | (-797.4 to 1398.0) | 0.57 |
|                                    | Total MVPA minute /week                   | -121.0                       | (-273.8 to 31.8)   | 0.11 |
|                                    | Score for adherence to Mediterranean Diet | -0.1                         | (-1.7 to 1.5)      | 0.91 |
| <b>Educational level completed</b> |                                           |                              |                    |      |
| University studies                 | METS minute/week in leisure time          | 67.1                         | (-208.8 to 343.0)  | 0.63 |
|                                    | Total MVPA minute /week                   | -1.2                         | (-52.4 to 50.1)    | 0.96 |
|                                    | Score for adherence to Mediterranean Diet | 0.3                          | (-0.2 to 0.7)      | 0.24 |
| Middle or High school              | METS minute/week in leisure time          | 76.6                         | (-128.3 to 281.6)  | 0.46 |
|                                    | Total MVPA minute /week                   | -18.2                        | (-55.2 to 18.7)    | 0.33 |
|                                    | Score for adherence to Mediterranean Diet | -0.2                         | (-0.5 to 0.1)      | 0.19 |
| Elementary school                  | METS minute/week in leisure time          | -55.7                        | (-323.0 to 211.5)  | 0.68 |
|                                    | Total MVPA minute /week                   | -39.1                        | (-103.5 to 25.4)   | 0.23 |
|                                    | Score for adherence to Mediterranean Diet | 0.1                          | (-0.4 to 0.6)      | 0.74 |
| <b>Work situation</b>              |                                           |                              |                    |      |
| Works outside of home              | METS minute/week in leisure time          | 95.1                         | (-85.7 to 275.8)   | 0.30 |
|                                    | Total MVPA minute /week                   | -22.4                        | (-60.1 to 15.2)    | 0.24 |
|                                    | Score for adherence to Mediterranean Diet | 0.1                          | (-0.3 to 0.4)      | 0.74 |
| Homemaker                          | METS minute/week in leisure time          | 55.0                         | (-311.7 to 421.8)  | 0.77 |
|                                    | Total MVPA minute /week                   | -2.6                         | (-70.2 to 64.9)    | 0.94 |
|                                    | Score for adherence to Mediterranean Diet | 0.0                          | (-0.5 to 0.5)      | 0.93 |
| Retired                            | METS minute/week in leisure time          | 20.0                         | (-337.1 to 377.1)  | 0.91 |
|                                    | Total MVPA minute /week                   | -15.8                        | (-77.3 to 45.7)    | 0.61 |
|                                    | Score for adherence to Mediterranean Diet | -0.2                         | (-0.7 to 0.3)      | 0.49 |
| Student                            | METS minute/week in leisure time          | 744.4                        | (-632.8 to 2121.6) | 0.26 |
|                                    | Total MVPA minute /week                   | -7.5                         | (-191.7 to 176.6)  | 0.93 |
|                                    | Score for adherence to Mediterranean Diet | 0.0                          | (-3.0 to 3.0)      | 0.99 |
| Unemployed                         | METS minute/week in leisure time          | 63.8                         | (-327.3 to 454.9)  | 0.75 |
|                                    | Total MVPA minute /week                   | -13.9                        | (-107.8 to 80.0)   | 0.77 |
|                                    | Score for adherence to Mediterranean Diet | -0.1                         | (-0.8 to 0.6)      | 0.76 |

APPG: Counseling+APP group, CG: Counseling group. BMI: Body mass index. MVPA: Moderate Vigorous/very vigorous physical activity. METS: metabolic equivalents. P: statistically significant differences ( $P < .05$ ). ANCOVA test adjusted by baseline measure comparing changes between intervention and control groups.
