# Supplementary material for: Short-Term Effectiveness of a Mobile Phone App for Increasing Physical Activity and Adherence to the Mediterranean Diet in Primary Care: A Randomized Controlled Trial (EVIDENT II Study)
Source: PubMed Central journal article supplement (PMC5206481; doi:10.2196/jmir.6814), 2016-12-19
Supplement: jmir_v18i12e331_app4.pdf [file jmir_v18i12e331_app4.pdf]

**7-day PAR in university women subgroup**

| N= 144 (APPG=67, CG=77)                                          | Unadjusted                          |            | Adjusted                            |     |
|------------------------------------------------------------------|-------------------------------------|------------|-------------------------------------|-----|
|                                                                  | Mean Difference<br>(APPG-CG) CI 95% | P          | Mean Difference<br>(APPG-CG) CI 95% | P   |
| Total minutes moderate activity                                  | 67.5 (-19.0 to 153.9)               | .12        | 37.3 (-33.3 to 107.8)               | .29 |
| Total minutes moderate activity in leisure time                  | 75.4 (2.3 to 148.5)                 | <b>.04</b> | 50.5 (-18.2 to 119.2)               | .15 |
| Total minutes vigorous/very vigorous activity                    | -2.8 (-33.5 to 27.9)                | .86        | 4.7 (-25.1 to 34.5)                 | .76 |
| Total minutes vigorous/very vigorous activity in leisure time    | 1.0 (-29.4 to 31.4)                 | .95        | 9.8 (-19.1 to 38.7)                 | .50 |
| Total minutes moderate vigorous/very vigorous activity           | 64.7 (-19.3 to 148.6)               | .13        | 47.9 (-24.7 to 120.5)               | .19 |
| Total minutes moderate vigorous/very v. activity in leisure time | 76.4 (-2.4 to 155.1)                | .06        | 57.9 (-15.9 to 131.7)               | .12 |
| METS minute/week                                                 | 260.3 (-100.4 to 621.0)             | .16        | 210.2 (-113.3 to 533.7)             | .20 |
| METS minute/week in leisure time                                 | 323.4 (-28.2 to 675.1)              | .07        | 258.3 (-70.5 to 587.0)              | .12 |

7-day PAR : 7-day physical activity recall questionnaire. APPG: Counseling+APP group, CG: Counseling group. METS: metabolic equivalents.

P: statistically significant differences ( $P < .05$ ). ANCOVA test unadjusted and adjusted by baseline measure.
